# Supplementary material for: A new Prenylated Flavonoid induces G0/G1 arrest and apoptosis through p38/JNK MAPK pathways in Human Hepatocellular Carcinoma cells
Source: PubMed Central journal article supplement (PMC5515844; doi:10.1038/s41598-017-05955-0), 2017-07-18
Supplement: 41598_2017_5955_MOESM1_ESM.pdf [file 41598_2017_5955_MOESM1_ESM.pdf]

# **A new Prenylated Flavonoid induces G0/G1 arrest and apoptosis through p38/JNK MAPK pathways in Human Hepatocellular Carcinoma cells**

Di Wang<sup>1,2+</sup>, Qian Sun<sup>1,2+</sup>, Jie Wu<sup>1,2</sup>, Wei Wang<sup>1,2</sup>, Guodong Yao<sup>1,2</sup>, Tianyang Li<sup>3</sup>, Xue Li<sup>3</sup>, Lingzhi Li<sup>1,2</sup>, Yan Zhang<sup>2,4</sup>, Wei Cui<sup>3,\*</sup>, Shaojiang Song<sup>1,2,\*</sup>

<sup>1</sup>*School of Traditional Chinese Materia Medica, Shenyang Pharmaceutical University, Shenyang 110016, People's Republic of China*

<sup>2</sup>*Key Laboratory of Structure-Based Drug Design and Discovery, Ministry of Education, Shenyang Pharmaceutical University, Shenyang 110016, People's Republic of China*

<sup>3</sup>*School of Life Science and Biopharmaceutics, Shenyang Pharmaceutical University, Shenyang 110016, People's Republic of China*

<sup>4</sup>*School of Pharmaceutical Engineering, Shenyang Pharmaceutical University, Shenyang, 110016, People's Republic of China*

\*Corresponding author. Tel: +86 24 23986510 (S. J. Song), +86 24 23986265 (W. Cui).

E-mail addresses: songsj99@163.com. (S. J. Song), cuiwei\_syphu@126.com (W. Cui).

<sup>+</sup>these authors contributed equally to this work

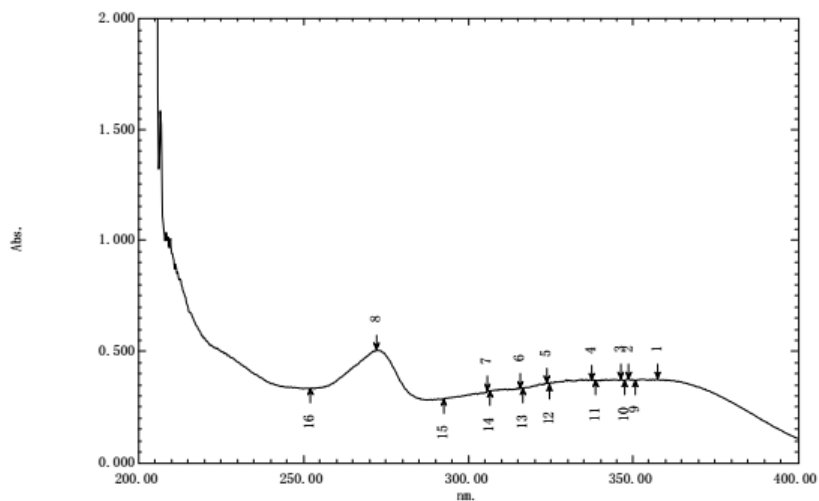

测定属性  
 波长范围 (nm.): 200.00到400.00  
 扫描速度: 高速  
 采样间隔: 0.2  
 自动采样间隔: 停用  
 扫描模式: 单一的

试样准备属性  
 重量: 0.3  
 体积: 10  
 稀释: 10  
 光程长: 407  
 附加信息:

仪器属性  
 仪器类型: UV-1700  
 测定方式: 吸收值  
 狭缝宽: 1.0 nm  
 光源改变波长: 340.8 nm  
 S/R 转换: 标准

| No. | P/V | Wavelength | Abs. | 描述 |
|-----|-----|------------|------|----|
| 1   | ●   | 357.40     | .375 |    |
| 2   | ●   | 348.80     | .375 |    |
| 3   | ●   | 346.40     | .374 |    |
| 4   | ●   | 337.40     | .373 |    |
| 5   | ●   | 323.80     | .357 |    |
| 6   | ●   | 316.00     | .337 |    |
| 7   | ●   | 306.00     | .325 |    |
| 8   | ●   | 272.20     | .506 |    |
| 9   | ●   | 350.60     | .370 |    |
| 10  | ●   | 347.40     | .370 |    |
| 11  | ●   | 338.80     | .368 |    |
| 12  | ●   | 324.60     | .355 |    |
| 13  | ●   | 316.80     | .333 |    |
| 14  | ●   | 306.80     | .322 |    |
| 15  | ●   | 292.40     | .284 |    |
| 16  | ●   | 252.20     | .332 |    |

Supplementary Figure S1.1 UV spectrum of daphnegiravone D

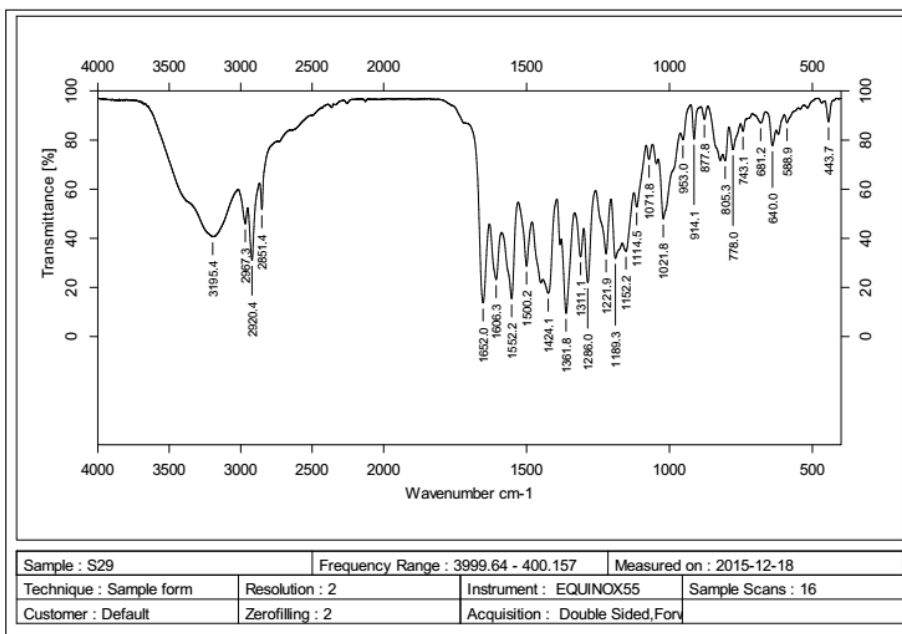

|                         |                 |                                     |                          |
|-------------------------|-----------------|-------------------------------------|--------------------------|
| Sample : S29            |                 | Frequency Range : 3999.64 - 400.157 | Measured on : 2015-12-18 |
| Technique : Sample form | Resolution : 2  | Instrument : EQUINOX55              | Sample Scans : 16        |
| Customer : Default      | Zerofilling : 2 | Acquisition : Double Sided,For      |                          |

Supplementary Figure S1.2 IR spectrum of daphnegiravone D

## Mass Spectrum Molecular Formula Report

**Analysis Info** D:\Data\20141211CEYANG\SQ-29\_1-B,8\_01\_4339.d  
**Analysis Name** Acquisition Date 12/11/2014 5:25:41 PM  
**Method** 20131026\_ceyang.m **Operator** micrOTOF-Q  
**Sample Name** SQ-29 **Instrument / Ser#** Bruker Customer 125  
**Comment**

**Acquisition Parameter**  
 Source Type ESI Ion Polarity Positive Set Nebulizer 1.2 Bar  
 Focus Active Set Capillary 4500 V Set Dry Heater 180 °C  
 Scan Begin 50 m/z Set End Plate Offset -500 V Set Dry Gas 8.0 l/min  
 Scan End 3000 m/z Set Collision Cell RF 600.0 Vpp Set Divert Valve Source

**Generate Molecular Formula Parameter**

|                  |            |                             |       |         |   |  |  |  |  |
|------------------|------------|-----------------------------|-------|---------|---|--|--|--|--|
| Formula, min.    | C26H28O6Na |                             |       |         |   |  |  |  |  |
| Formula, max.    |            |                             |       |         |   |  |  |  |  |
| Measured m/z     | 459.178    | Tolerance                   | 5 ppm | Charge  | 1 |  |  |  |  |
| Check Valence    | no         | Minimum                     | 0     | Maximum | 0 |  |  |  |  |
| Nitrogen Rule    | no         | Electron Configuration both |       | Maximum | 3 |  |  |  |  |
| Filter H/C Ratio | no         | Minimum                     | 0     |         |   |  |  |  |  |
| Estimate Carbon  | yes        |                             |       |         |   |  |  |  |  |

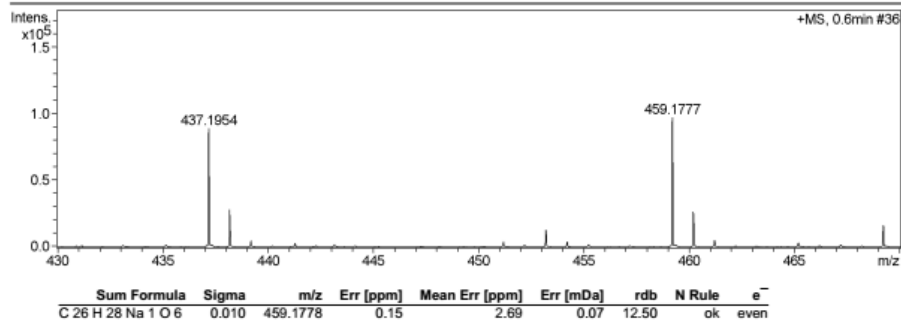

**Supplementary Figure S1.3** HRESIMS spectrum of daphnegiravone D

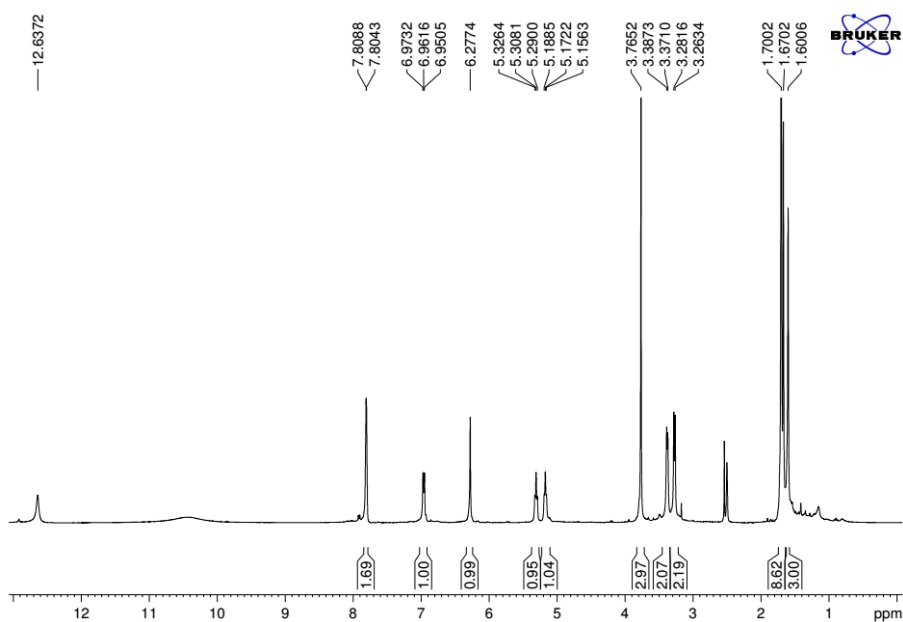

**Supplementary Figure S1.4** <sup>1</sup>H NMR spectrum (400 MHz, DMSO-*d*<sub>6</sub>) of daphnegiravone D

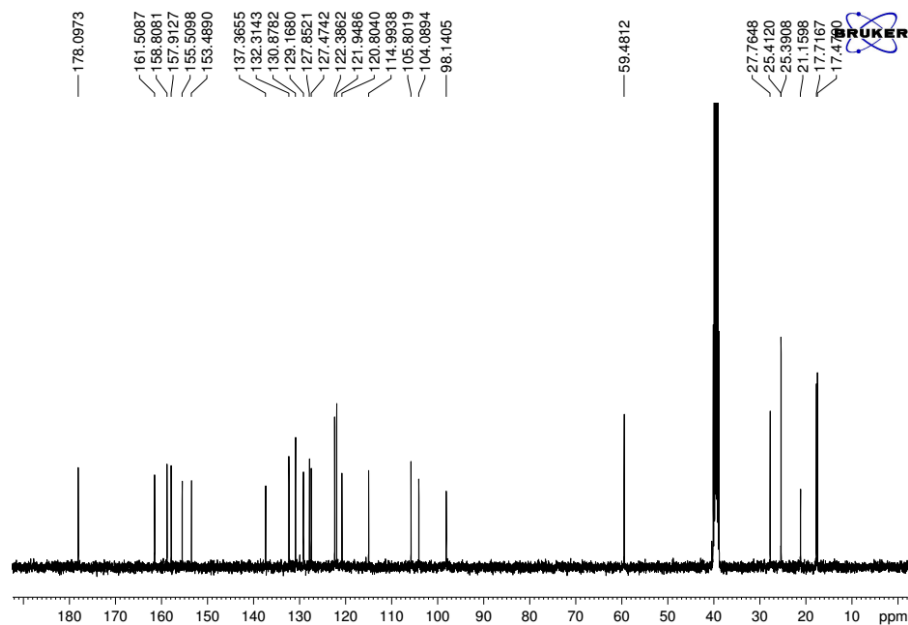

**Supplementary Figure S1.5**  $^{13}\text{C}$  NMR spectrum (100 MHz,  $\text{DMSO-}d_6$ ) of daphnegiravone D

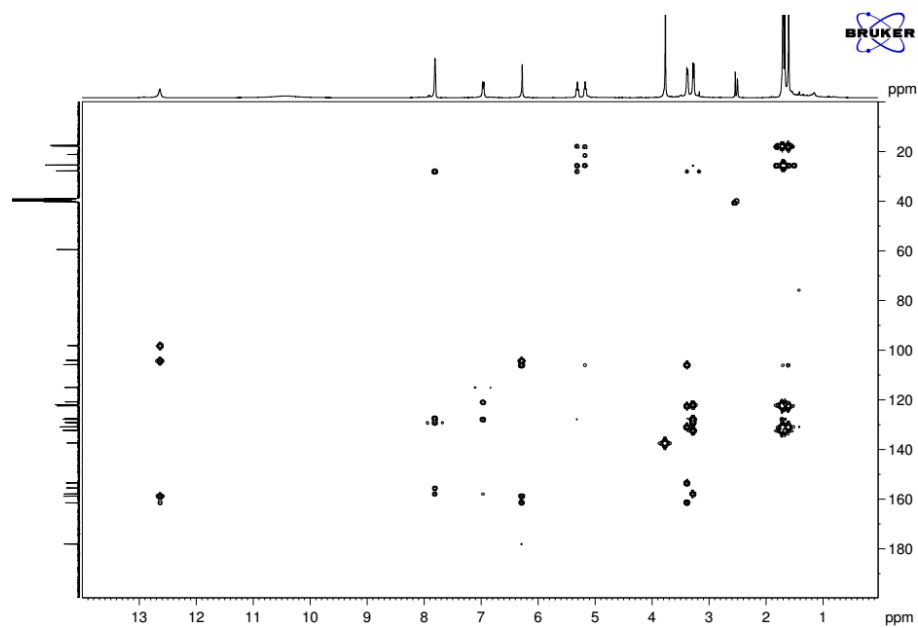

**Supplementary Figure S1.6** HMBC spectrum (600 MHz,  $\text{DMSO-}d_6$ ) of daphnegiravone D

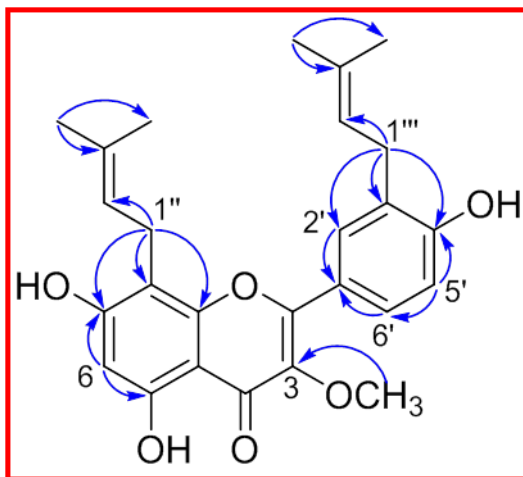

Supplementary Figure S1.7 Key HMBC correlations of daphnegiravone D.

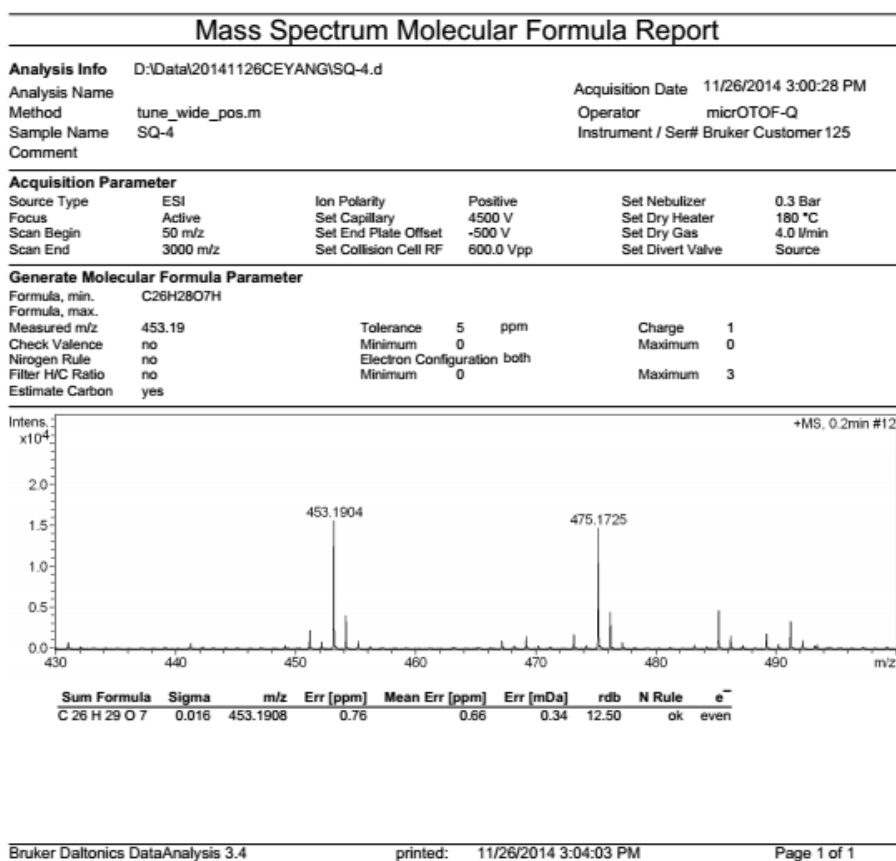

Supplementary Figure S2.1 HRESIMS spectrum of brousoflavonol B

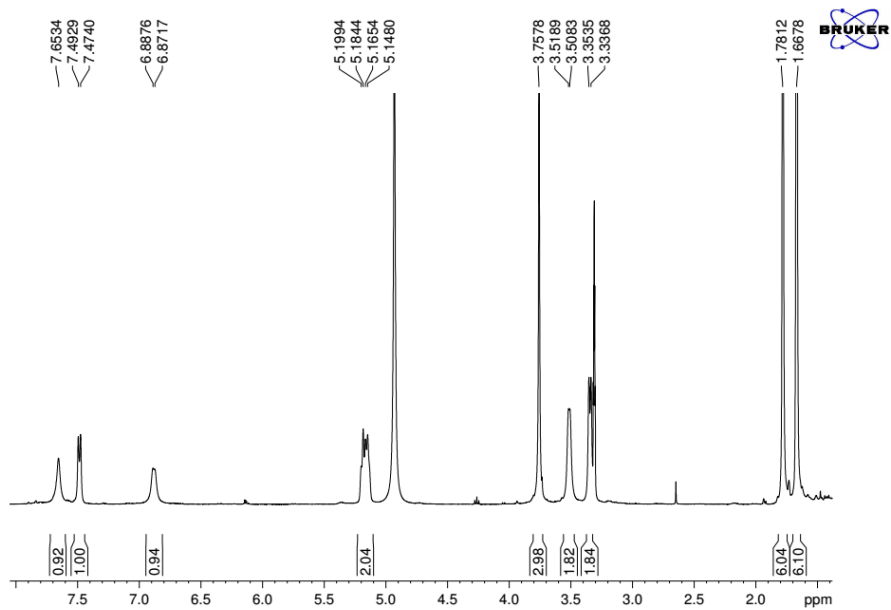

**Supplementary Figure S2.2**  $^1\text{H}$  NMR spectrum (400 MHz,  $\text{DMSO-}d_6$ ) of brousoflavonol B

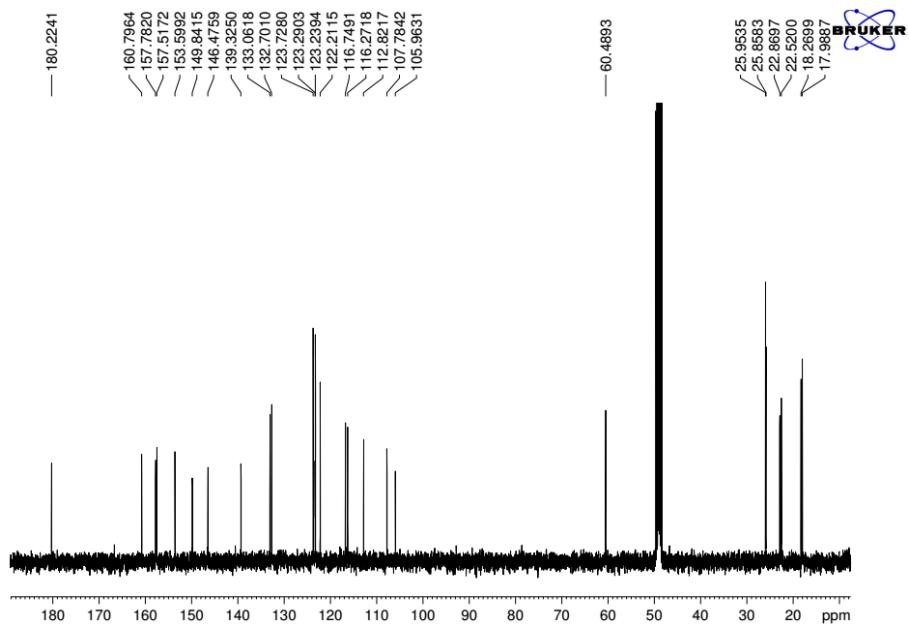

**Supplementary Figure S2.3**  $^{13}\text{C}$  NMR spectrum (100 MHz,  $\text{DMSO-}d_6$ ) of brousoflavonol B

## Mass Spectrum Molecular Formula Report

**Analysis Info** D:\Data\20141211CEYANG\SQ-28\_1-B,6\_01\_4337.d  
Analysis Name  
Method 20131026\_ceyang.m  
Sample Name SQ-28  
Comment  
Acquisition Date 12/11/2014 5:17:21 PM  
Operator micrOTOF-Q  
Instrument / Ser# Bruker Customer 125

### Acquisition Parameter

|             |          |                       |           |                  |           |
|-------------|----------|-----------------------|-----------|------------------|-----------|
| Source Type | ESI      | Ion Polarity          | Positive  | Set Nebulizer    | 1.2 Bar   |
| Focus       | Active   | Set Capillary         | 4500 V    | Set Dry Heater   | 180 °C    |
| Scan Begin  | 50 m/z   | Set End Plate Offset  | -500 V    | Set Dry Gas      | 8.0 l/min |
| Scan End    | 3000 m/z | Set Collision Cell RF | 600.0 Vpp | Set Divert Valve | Source    |

### Generate Molecular Formula Parameter

|                  |           |                        |       |         |   |
|------------------|-----------|------------------------|-------|---------|---|
| Formula, min.    | C25H24O6H |                        |       |         |   |
| Formula, max.    |           |                        |       |         |   |
| Measured m/z     | 421.165   | Tolerance              | 5 ppm | Charge  | 1 |
| Check Valence    | no        | Minimum                | 0     | Maximum | 0 |
| Nitrogen Rule    | no        | Electron Configuration | both  |         |   |
| Filter H/C Ratio | no        | Minimum                | 0     | Maximum | 3 |
| Estimate Carbon  | yes       |                        |       |         |   |

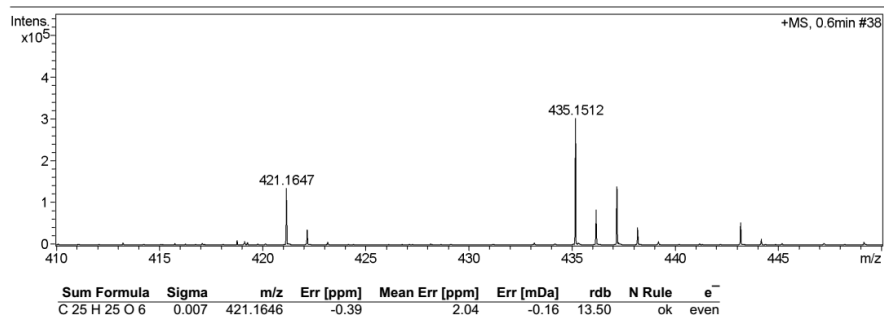

## Supplementary Figure S3.1 HRESIMS spectrum of morusin

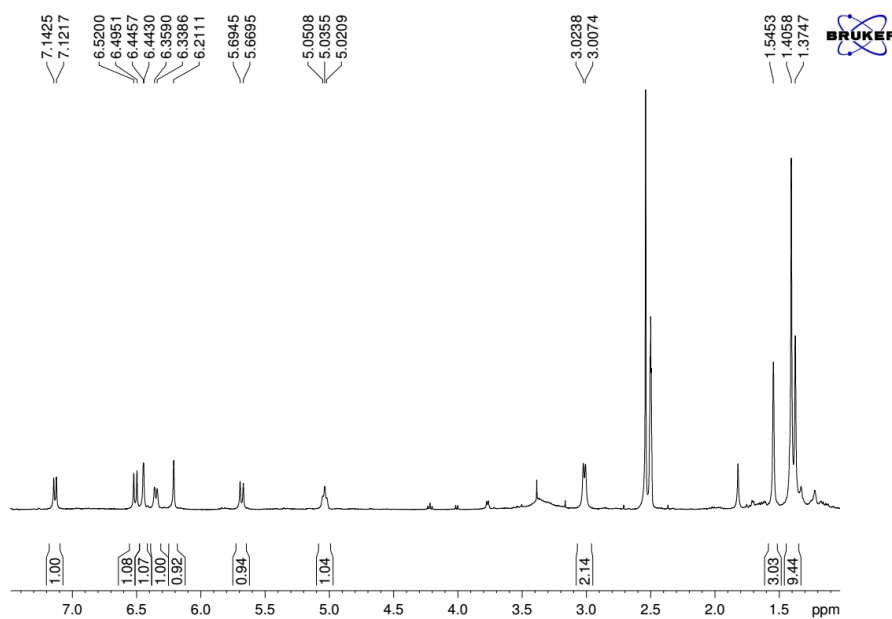

Supplementary Figure S3.2 <sup>1</sup>H NMR spectrum (400 MHz, DMSO-*d*<sub>6</sub>) of morusin

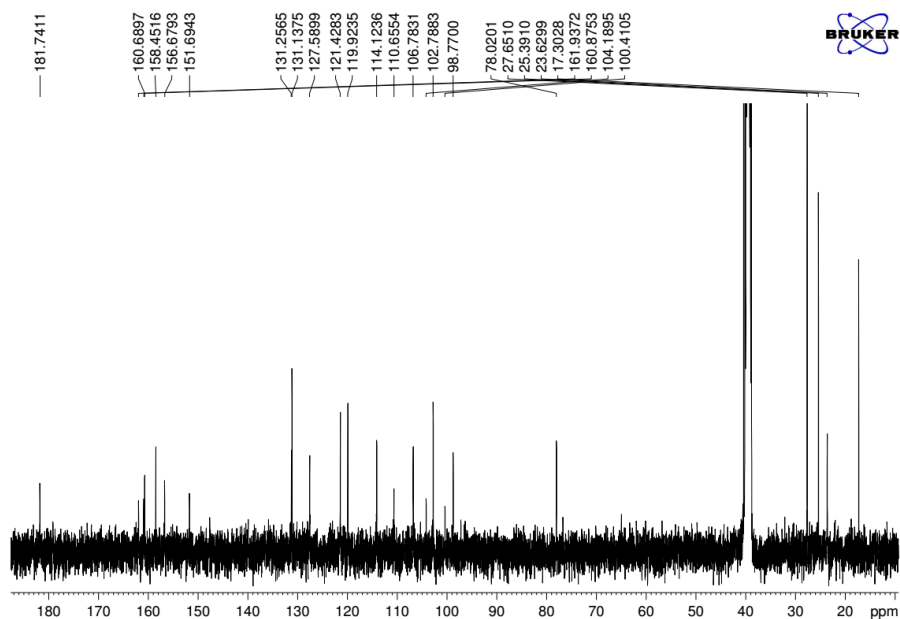

Supplementary Figure S3.3  $^{13}\text{C}$  NMR spectrum (100 MHz,  $\text{DMSO-}d_6$ ) of morusin

### Mass Spectrum Molecular Formula Report

#### Analysis Info

|               |                                              |                   |                       |
|---------------|----------------------------------------------|-------------------|-----------------------|
| Analysis Name | D:\Data\20150521CEYANG\SQ-27_1-B,2_01_5170.d | Acquisition Date  | 5/21/2015 11:24:29 AM |
| Method        | 20150520yezhi.m                              | Operator          | micrOTOF-Q            |
| Sample Name   | SQ-27                                        | Instrument / Ser# | Bruker Customer 125   |
| Comment       |                                              |                   |                       |

#### Acquisition Parameter

|             |          |                       |           |                  |           |
|-------------|----------|-----------------------|-----------|------------------|-----------|
| Source Type | ESI      | Ion Polarity          | Positive  | Set Nebulizer    | 1.2 Bar   |
| Focus       | Active   | Set Capillary         | 4500 V    | Set Dry Heater   | 180 °C    |
| Scan Begin  | 50 m/z   | Set End Plate Offset  | -500 V    | Set Dry Gas      | 8.0 l/min |
| Scan End    | 3000 m/z | Set Collision Cell RF | 200.0 Vpp | Set Divert Valve | Source    |

#### Generate Molecular Formula Parameter

|                  |                                                  |                        |       |         |   |
|------------------|--------------------------------------------------|------------------------|-------|---------|---|
| Formula, min.    | C <sub>26</sub> H <sub>26</sub> O <sub>7</sub> H |                        |       |         |   |
| Formula, max.    |                                                  |                        |       |         |   |
| Measured m/z     | 451.175                                          | Tolerance              | 5 ppm | Charge  | 1 |
| Check Valence    | no                                               | Minimum                | 0     | Maximum | 0 |
| Nitrogen Rule    | yes                                              | Electron Configuration | both  |         |   |
| Filter H/C Ratio | yes                                              | Minimum                | 0     | Maximum | 3 |
| Estimate Carbon  | yes                                              |                        |       |         |   |

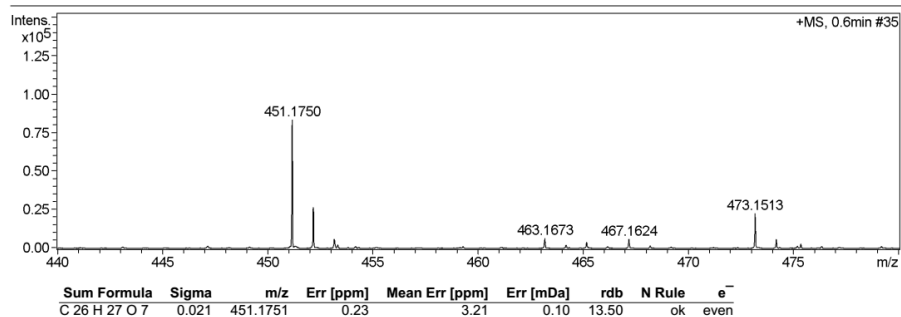

Supplementary Figure S4.1 HRESIMS spectrum of daphnegravone A



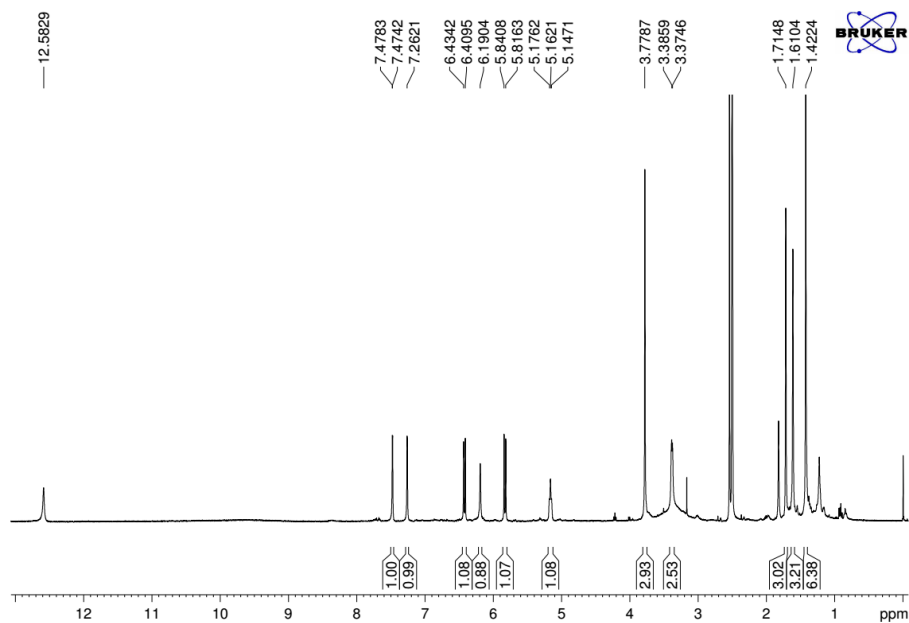

**Supplementary Figure S4.2**  $^1\text{H}$  NMR spectrum (400 MHz,  $\text{DMSO-}d_6$ ) of daphnegiravone A

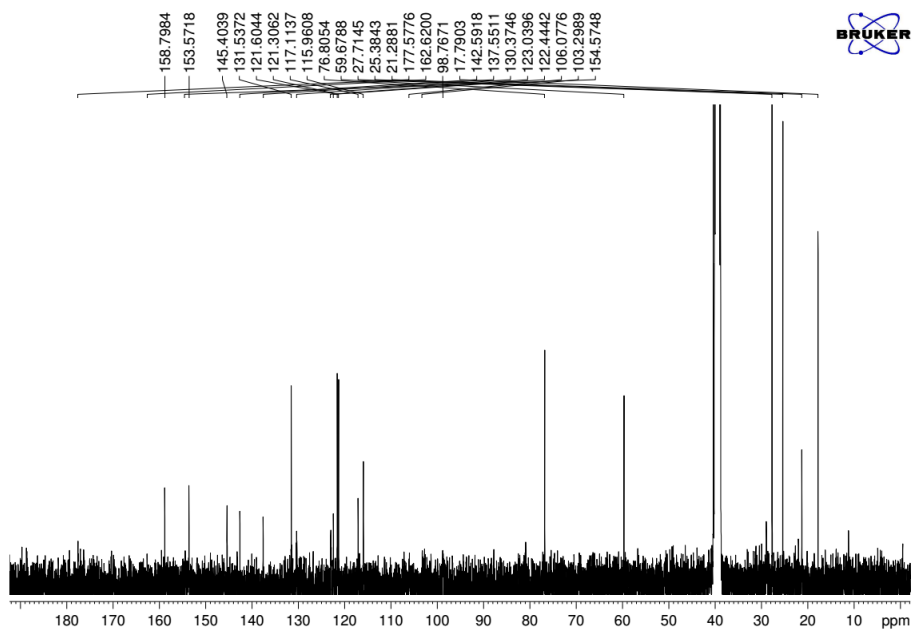

**Supplementary Figure S4.3**  $^{13}\text{C}$  NMR spectrum (100 MHz,  $\text{DMSO-}d_6$ ) of daphnegiravone A

## Mass Spectrum Molecular Formula Report

### Analysis Info

|               |                                               |                   |                       |
|---------------|-----------------------------------------------|-------------------|-----------------------|
| Analysis Name | D:\Data\20151113CEYANG\HRX-30_1-C,5_01_5934.d | Acquisition Date  | 11/13/2015 2:22:46 PM |
| Method        | 20131026_ceyang.m                             | Operator          | micrOTOF-Q            |
| Sample Name   | HRX-30                                        | Instrument / Ser# | Bruker Customer 125   |
| Comment       |                                               |                   |                       |

### Acquisition Parameter

|             |          |                       |           |                  |           |
|-------------|----------|-----------------------|-----------|------------------|-----------|
| Source Type | ESI      | Ion Polarity          | Positive  | Set Nebulizer    | 1.2 Bar   |
| Focus       | Active   | Set Capillary         | 4500 V    | Set Dry Heater   | 180 °C    |
| Scan Begin  | 50 m/z   | Set End Plate Offset  | -500 V    | Set Dry Gas      | 8.0 l/min |
| Scan End    | 3000 m/z | Set Collision Cell RF | 400.0 Vpp | Set Divert Valve | Source    |

### Generate Molecular Formula Parameter

|                  |            |                        |       |
|------------------|------------|------------------------|-------|
| Formula, min.    | C25H28O5Na |                        |       |
| Formula, max.    |            |                        |       |
| Measured m/z     | 431.184    | Tolerance              | 5 ppm |
| Check Valence    | no         | Minimum                | 0     |
| Nitrogen Rule    | yes        | Electron Configuration | both  |
| Filter H/C Ratio | yes        | Minimum                | 0     |
| Estimate Carbon  | yes        |                        |       |
|                  |            | Charge                 | 1     |
|                  |            | Maximum                | 0     |
|                  |            | Maximum                | 3     |

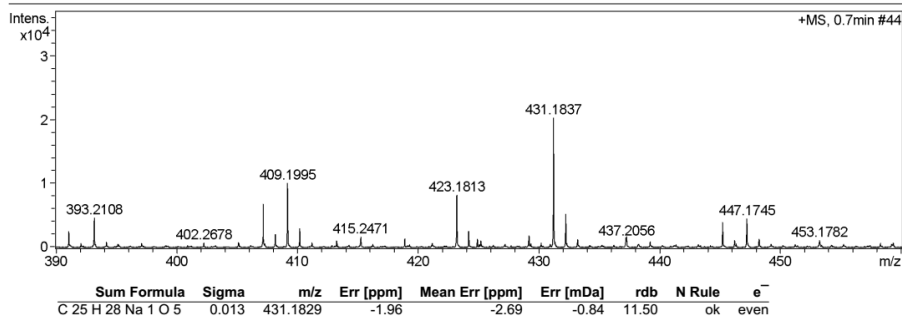

## Supplementary Figure S5.1 HRESIMS spectrum of daphnegiravone C

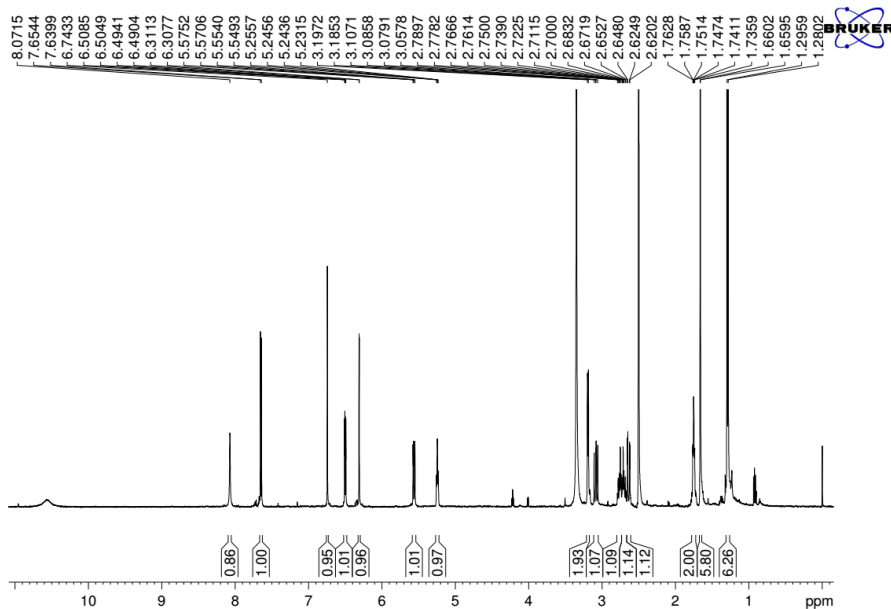

Supplementary Figure S5.2 <sup>1</sup>H NMR spectrum (400 MHz, DMSO-d<sub>6</sub>) of daphnegiravone C

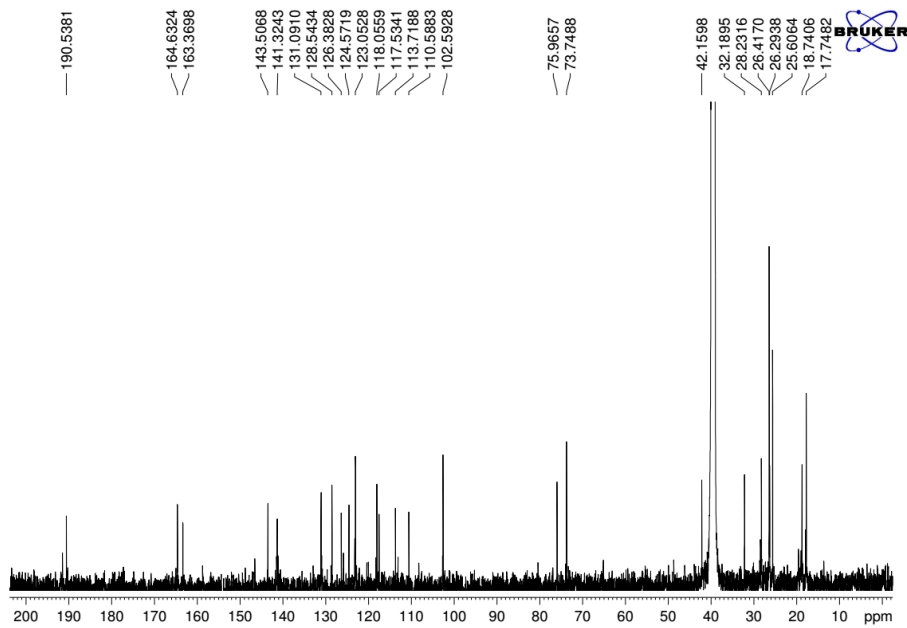

**Supplementary Figure S5.3**  $^{13}\text{C}$  NMR spectrum (100 MHz,  $\text{DMSO-}d_6$ ) of daphnegiravone C

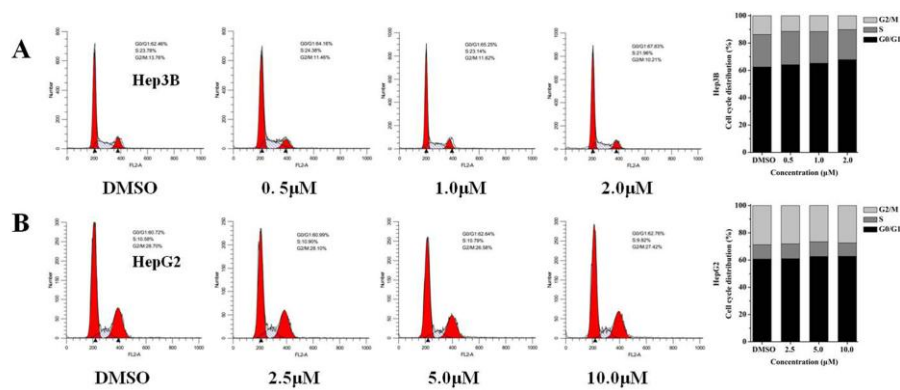

**Supplementary Figure S6** Cell cycle effects of daphnegiravone D on Hep3B and HepG2 cells. Cells were induced with a variety of concentrations (0.5–2.0  $\mu\text{M}$  for Hep3B and 2.5–10.0  $\mu\text{M}$  for HepG2 cells) for 24 h, and subsequently cells were harvested, stained and cell cycle were analyzed by flow cytometry. The histograms were presented to describe the effect of cell cycle.

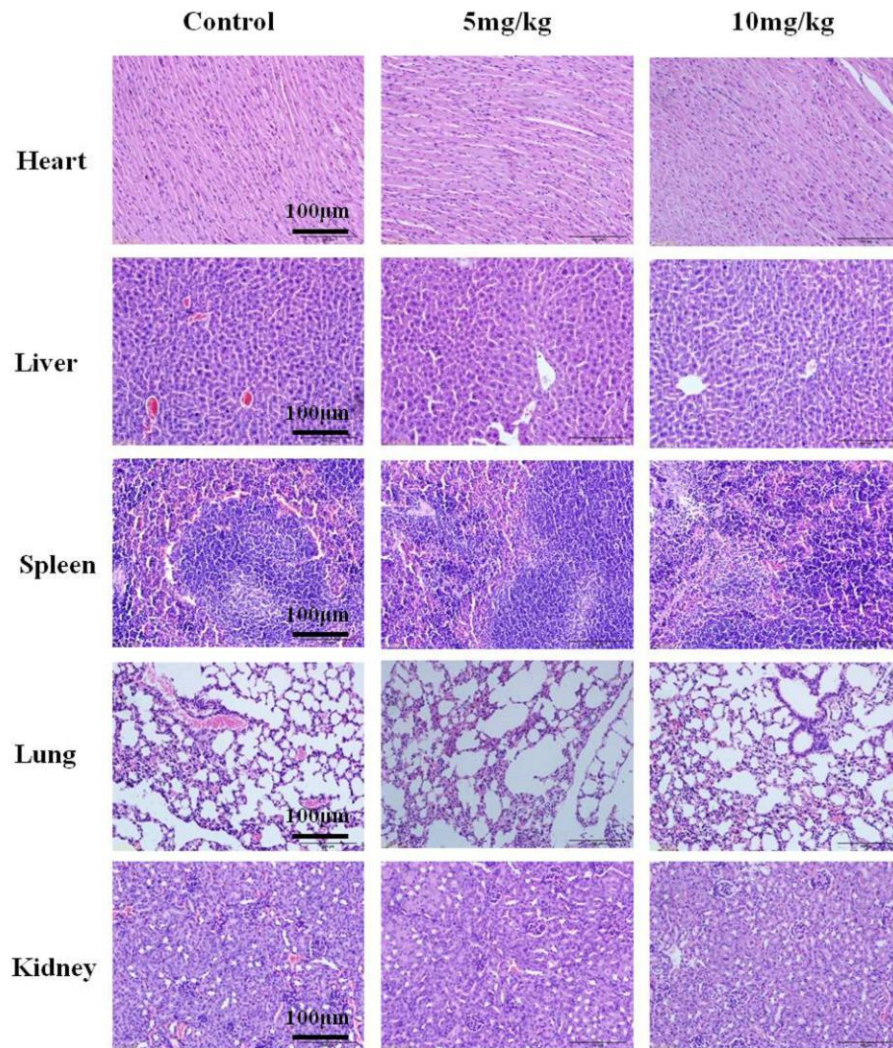

**Supplementary Figure S7.** Histological analysis of heart, liver, spleen, lung and kidney obtained from nude mice after daphnegiravone D treatment. Hematoxylin-eosin staining; Scale bar, 100  $\mu\text{m}$ .
